# Supplementary material for: Supramolecular association of M2+⋯π induced by different electrostatic properties using naphthyl substituted β-diketonate complexes (metal = Cu, Pd, Pt)
Source: Royal Society of Chemistry journal article supplement (doi:10.1039/d0ce00416b), 2020-01-01
Supplement: d0ce00416b1.pdf [file d0ce00416b1.pdf]

ELECTRONIC SUPPLEMENTARY INFORMATION

**Supramolecular Association of  $M^{2+} \cdots \pi$  Induced by Different Electrostatic Properties using Naphthyl Substituted  $\beta$ -Diketonate Complexes (Metal = Cu, Pd, Pt)**

T. Kusakawa, T. Goto, and A. Hori\*

\*To whom the correspondence should be addressed (e-mail: ahorti@shibaura-it.ac.jp)

---

|                                                                         |       |      |
|-------------------------------------------------------------------------|-------|------|
| <b>S1.</b> Preparations of $HL^2$ and complex <b>2</b> .                | ..... | p. 1 |
| <b>S2.</b> Crystal data and structures of $HL^2$ and complex <b>2</b> . | ..... | p. 3 |
| <b>S3.</b> Packing structures of <b>2</b> .                             | ..... | p. 6 |
| <b>S4.</b> Remarkable intermolecular interactions of <b>2</b> .         | ..... | p. 7 |
| <b>S5.</b> DFT calculations of <b>1</b> and <b>2</b> .                  | ..... | p. 8 |

---

**S1. Synthesis of  $HL^2$  and complex **2****

(1) General.

All the chemicals were of reagent grade and used without further purification. Melting points were measured by Yanaco MP-500P.  $^1H$  NMR spectra were recorded on a JEOL ECS-400 spectrometer. IR spectra were measured by Shimadzu FTIR-8400S spectrophotometer.

(2) Synthesis and physical properties of  $HL^2$ .

Under Ar atmosphere, freshly distilled 1,1,2,2-tetrachloroethane (50 mL) was added to aluminum(III) chloride (7.54 g, 56.6 mmol), and the mixture was dissolved at 45 °C. A solution of 2-naphthochloride (10.50 g, 55.1 mmol) in 1,1,2,2-tetrachloroethane (50 mL) was added to the solution. Vinyl acetate (5.05 mL, 55.0 mmol) was slowly added dropwise into the solution under 32 °C, and then, the solution was stirred at 35 °C for 18 hours. The reaction mixture was added to 10% HCl aqueous solution under ice-bath, and the solvent was removed by steam distillation. The residue was separated by filtration, extracted by chloroform, and washed by hexane. The product was purified by column chromatography (silica,  $CDCl_3$ ). Pale yellow microcrystals, Yield 14%. mp 152-153 °C.  $^1H$  NMR (400 MHz,  $CDCl_3$ , TMS):  $\delta$  7.16 (s, CH, 1H), 7.60 (m, 4H), 8.00 (m, 8H), 8.60 (s, 2H), 17.06 (s, 1H, OH). IR (KBr disk,  $cm^{-1}$ ): 3055, 1627, 1599, 1583, 1527, 1499, 1429, 1192, 950, 789, 479.

(3) Synthesis and physical properties of **2a**.

A methanol solution (10 mL) of sodium methoxide (118 mg, 2.18 mmol) was slowly added to a THF solution (30 mL) of ligand  $HL^2$  (680 mg, 2.10 mmol), and the mixture was stirred at r.t. for 15 min, and

then  $\text{CuCl}_2 \cdot 2\text{H}_2\text{O}$  (179 mg, 1.05 mmol) in MeOH (5 mL) was added to the solution. After stirring for 2 hours, the solution was extracted by  $\text{CHCl}_3$  and washed by water, dried by  $\text{MgSO}_4$ . The crystal of **2a** was obtained from natural evaporation of the hexane- $\text{CH}_2\text{Cl}_2$  solution. Yellowish green prismatic crystals, Yield 88%. mp 300 °C dec. IR (KBr disk,  $\text{cm}^{-1}$ ): 1597, 1591, 1554, 1521, 1498, 1442, 1400, 1342, 1300, 1130, 798.

(4) Synthesis and physical properties of **2b**.

A THF solution (5 mL) of ligand  $\text{HL}^2$  (120 mg, 0.37 mmol) was added dropwise into an aqueous solution (15 mL) of potassium tetrachloropalladate (60.8 mg, 0.19 mmol), to give a pale-yellow precipitate in the mixture. Then, 5M NaOH aq. was added into the solution during the colour changing, and the mixture was stirred at r.t. for overnight. After removing the solvent, yellow precipitates were filtered. TLC (silica,  $\text{CHCl}_3$ ) shows a pure product at  $R_f = 0.3$ . The crystal of **2b** was obtained from natural evaporation of the hexane- $\text{CH}_2\text{Cl}_2$  solution. Yellow prismatic crystals, Yield 28%. mp 270 °C dec.  $^1\text{H}$  NMR (400MHz,  $\text{CDCl}_3$ , TMS):  $\delta$  7.16 (s, CH, 2H), 7.58 (t,  $J = 7.4$  Hz, 4H), 7.61 (t,  $J = 7.4$  Hz, 4H), 7.91 (d,  $J = 7.4$  Hz, 4H), 7.96 (d,  $J = 8.4$  Hz, 4H), 8.02 (d,  $J = 7.4$  Hz, 4H), 8.08 (d,  $J = 8.4$  Hz, 4H), 8.60 (s, 4H). IR (KBr disk,  $\text{cm}^{-1}$ ): 1597, 1527, 1504, 1433, 1392, 1344, 1203, 795, 752, 474.

(5) Synthesis and physical properties of **2c**.

2.5 M NaOH aq. (2 mL) was added dropwise into a THF solution (20 mL) of ligand  $\text{HL}^2$  (328 mg, 1.0 mmol), and the solution was added into an aqueous solution of 25 mM  $[\text{Pt}(\text{H}_2\text{O})_4](\text{ClO}_4)_2$  at 90 °C under a rate of 3-4 drops per sec. to give black precipitates in the mixture. Then, 1M NaOH aq. was added into the solution during the color changing, and the mixture was stirred at 90 °C for 44 h. After removing the solvent, black precipitates were filtered. The residue was extracted by  $\text{CH}_2\text{Cl}_2$  and dried by  $\text{MgSO}_4$  to yield orange and brown solids as crude products. This red-orange solid was dissolved in  $\text{CH}_2\text{Cl}_2$  and it was natural evaporated to give crystal **2c**. Orange prismatic crystals, Yield 24%. mp 280 °C dec.  $^1\text{H}$  NMR (400MHz,  $\text{CDCl}_3$ , TMS):  $\delta$  7.17 (s, CH, 2H), 7.58 (t,  $J = 7.2$  Hz, 4H), 7.61 (t,  $J = 7.2$  Hz, 4H), 7.91 (d,  $J = 7.2$  Hz, 4H), 7.96 (d,  $J = 8.8$  Hz, 4H), 8.02 (d,  $J = 7.2$  Hz, 4H), 8.08 (d,  $J = 8.8$  Hz, 4H), 8.60 (s, 4H). IR (KBr disk,  $\text{cm}^{-1}$ ): 1521, 1504, 1460, 1429, 1386, 1342, 1203, 798, 744, 479.

## S2. Crystal data and structures of HL<sup>2</sup> and complex 2.

The crystal data were shown in Table S1.

**Table S1.** Crystal data of HL<sup>2</sup> and complex 2.

|                                                  | HL <sup>2</sup>                                | 2a                                               | 2b                                               | 2c                                               |
|--------------------------------------------------|------------------------------------------------|--------------------------------------------------|--------------------------------------------------|--------------------------------------------------|
| Chemical formula                                 | C <sub>23</sub> H <sub>16</sub> O <sub>2</sub> | C <sub>46</sub> H <sub>30</sub> CuO <sub>4</sub> | C <sub>46</sub> H <sub>30</sub> PdO <sub>4</sub> | C <sub>46</sub> H <sub>30</sub> PtO <sub>4</sub> |
| Description, color                               | plate, pale yellow                             | prismatic, green                                 | prismatic, yellow                                | prismatic, orange                                |
| Crystal size                                     | 0.257x0.157x0.024                              | 0.130x0.065x0.047                                | 0.128x0.124x0.045                                | 0.067x0.044x0.028                                |
| Formula weight                                   | 324.36                                         | 710.24                                           | 753.10                                           | 841.79                                           |
| <i>T</i> [K]                                     | 100                                            | 100                                              | 100                                              | 200                                              |
| Crystal system                                   | orthorhombic                                   | monoclinic                                       | monoclinic                                       | monoclinic                                       |
| Space group                                      | <i>Pna</i> 2 <sub>1</sub>                      | <i>P</i> 2 <sub>1</sub> / <i>n</i>               | <i>C</i> 2/ <i>c</i>                             | <i>P</i> 2 <sub>1</sub> / <i>n</i>               |
| <i>a</i> [Å]                                     | 7.2918(5)                                      | 13.093(7)                                        | 35.924(6)                                        | 15.8989(17)                                      |
| <i>b</i> [Å]                                     | 5.9870(4)                                      | 5.920(4)                                         | 6.0389(11)                                       | 6.0142(6)                                        |
| <i>c</i> [Å]                                     | 36.209(2)                                      | 21.808(12)                                       | 16.287(3)                                        | 17.7912(19)                                      |
| $\alpha$ [°]                                     | 90                                             | 90                                               | 90                                               | 90                                               |
| $\beta$ [°]                                      | 90                                             | 102.070(11)                                      | 109.919(5)                                       | 97.217(5)                                        |
| $\gamma$ [°]                                     | 90                                             | 90                                               | 90                                               | 90                                               |
| <i>V</i> [Å <sup>3</sup> ]                       | 1580.74(18)                                    | 1653.0(16)                                       | 3321.9(10)                                       | 1687.7(3)                                        |
| <i>Z</i>                                         | 4                                              | 2                                                | 4                                                | 2                                                |
| <i>D</i> <sub>c</sub> [g cm <sup>-3</sup> ]      | 1.363                                          | 1.427                                            | 1.506                                            | 1.656                                            |
| <i>F</i> (000)                                   | 680                                            | 734                                              | 1536                                             | 832                                              |
| <i>R</i> <sub>int</sub>                          | 0.0571                                         | 0.1166                                           | 0.1259                                           | 0.1606                                           |
| Reflections measured                             | 18478                                          | 20850                                            | 17498                                            | 21540                                            |
| Reflections independent                          | 2795                                           | 2901                                             | 2927                                             | 2980                                             |
| GOF                                              | 1.130                                          | 1.078                                            | 1.046                                            | 1.032                                            |
| <i>R</i> [( <i>I</i> ) > 2σ( <i>I</i> )]         | 0.0741                                         | 0.0452                                           | 0.0453                                           | 0.0458                                           |
| <i>wR</i> ( <i>F</i> <sub>o</sub> <sup>2</sup> ) | 0.2197                                         | 0.1048                                           | 0.1095                                           | 0.0912                                           |
| CCDC No.                                         | 1984649                                        | 1984650                                          | 1984651                                          | 1984652                                          |

a) Molecular structure of HL<sup>2</sup>:

In the crystal (Figure S1), whole molecule HL<sup>2</sup> was observed as asymmetric unit. H atoms attached to C atoms were refined as riding on their idealized positions, with C-H = 0.95 Å for aromatic atoms.

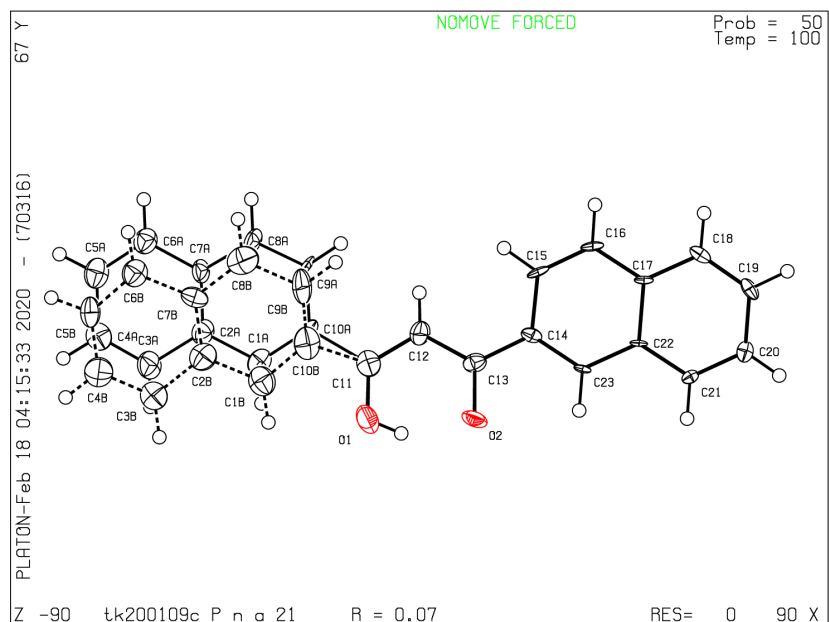

**Figure S1.** The molecular structure of HL<sup>2</sup> drawing by PLATON in checkCIF.

b) Molecular structure of 2a:

In the crystal (Figure S2), one half of the complex was observed as asymmetric unit. The whole complex was comprised as one Cu(II) ions, two ligands L<sup>2</sup>. H atoms attached to C atoms were refined as riding on their idealized positions, with C-H = 0.95 Å for aromatic atoms.

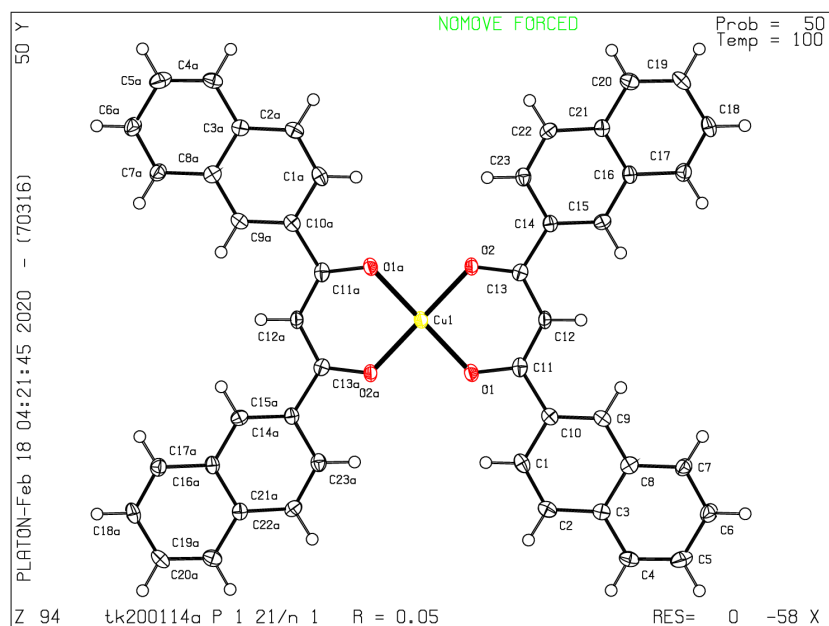

**Figure S2.** The molecular structure of 2a drawing by PLATON in checkCIF.

c) Molecular structure of **2b**:

In the crystal (Figure S3), one half of the complex was observed as asymmetric unit. The whole complex was comprised as one Pd(II) ions, two ligands  $L^2$ . H atoms attached to C atoms were refined as riding on their idealized positions, with C-H = 0.95 Å for aromatic atoms.

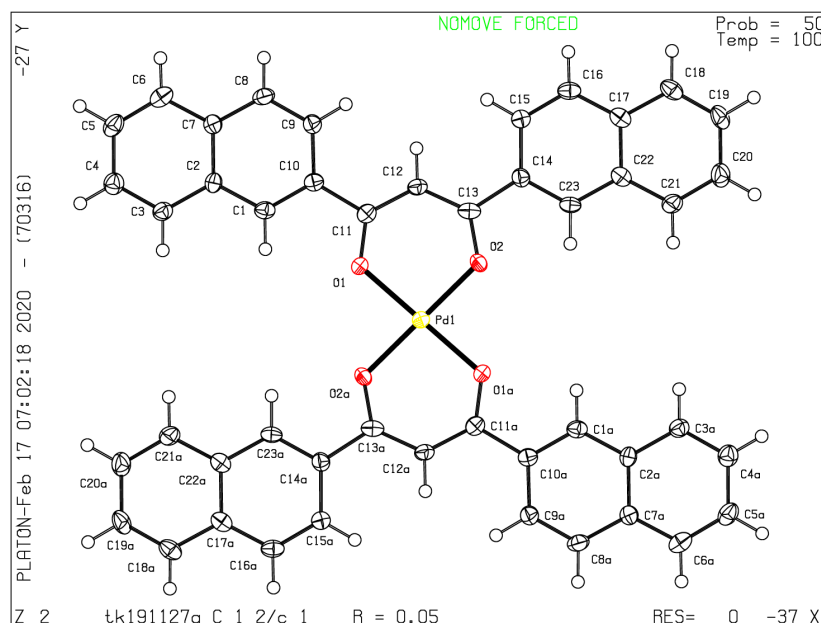

**Figure S3.** The molecular structure of **2b** drawing by PLATON in checkCIF.

d) Molecular structure of **2c**:

In the crystal (Figure S4), one half of the complex was observed as asymmetric unit. The whole complex was comprised as one Pt(II) ions, two ligands  $L^2$ . H atoms attached to C atoms were refined as riding on their idealized positions, with C-H = 0.95 Å for aromatic atoms.

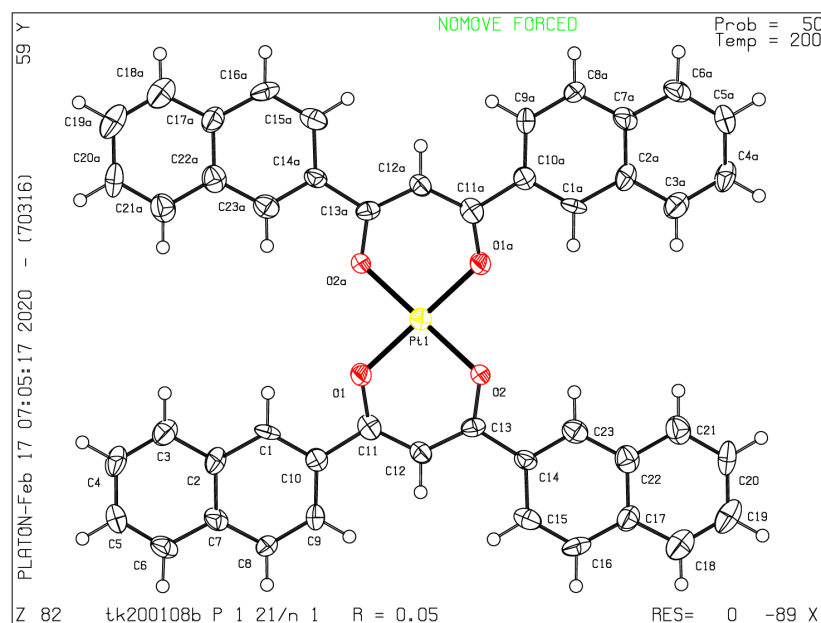

**Figure S4.** The molecular structure of **2c** drawing by PLATON in checkCIF.

### S3. Packing structures of 2.

#### a) Packing structure of 2a:

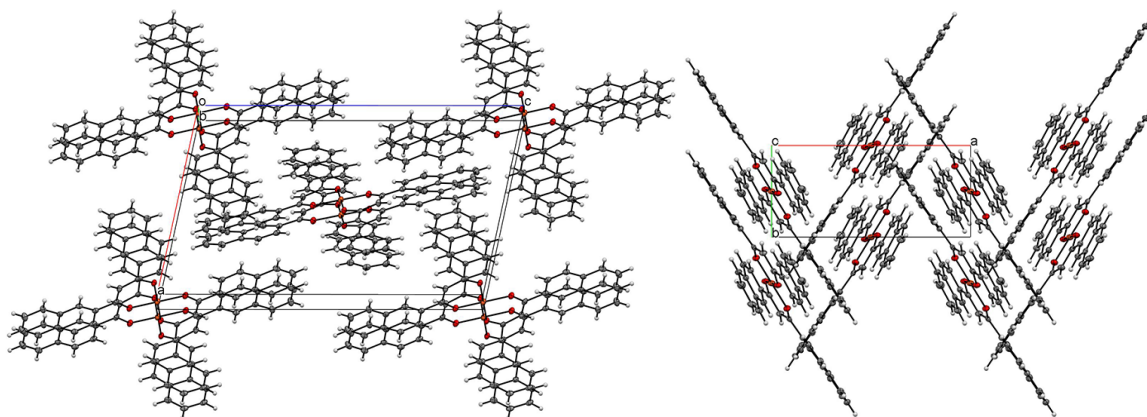

Figure S5. The packing structure of 2a drawing by Mercury.

#### b) Packing structure of 2b:

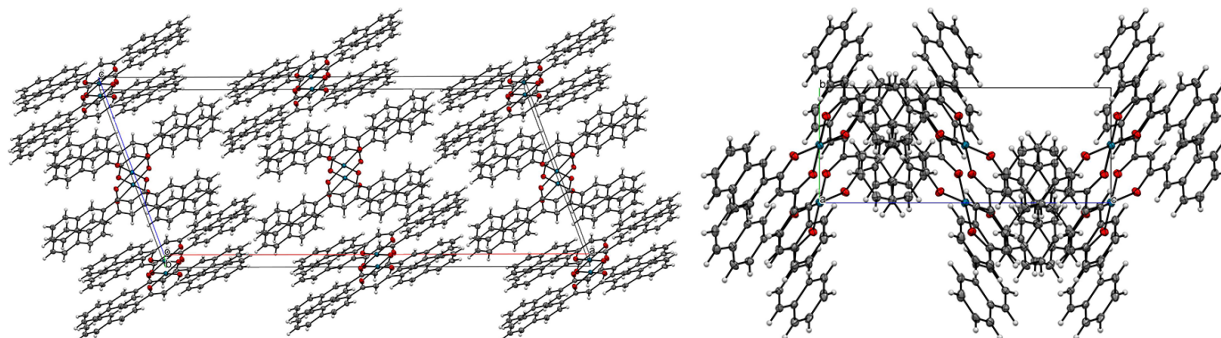

Figure S6. The packing structure of 2b drawing by Mercury.

#### c) Packing structure of 2c:

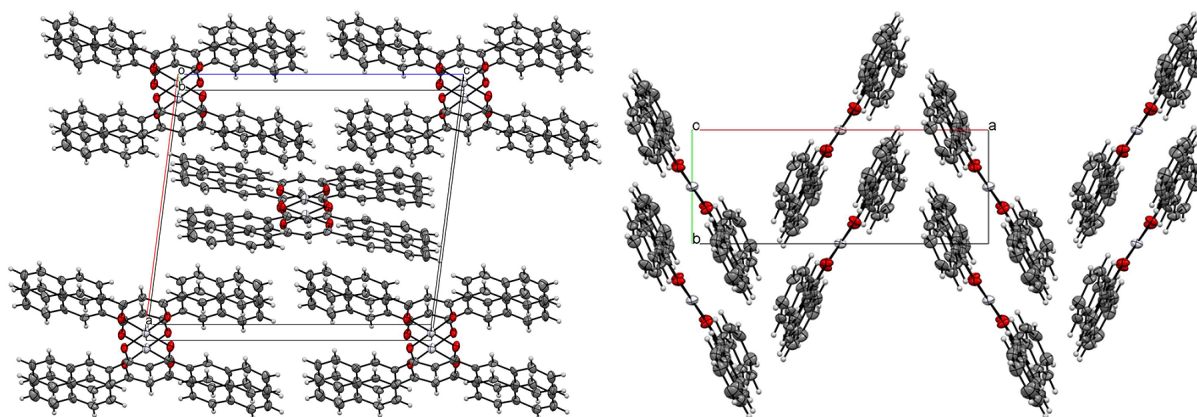

Figure S7. The packing structure of 2c drawing by Mercury.

#### S4. Remarkable intermolecular interactions of 2.

a) Metal $\cdots\pi$  and CH $\cdots\pi$  interactions of 2a:

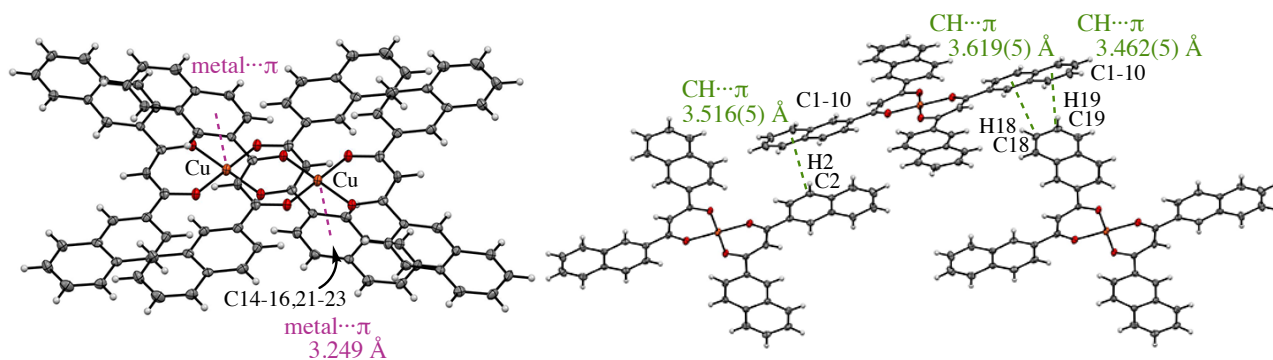

Figure S8. Parts of packing structure of 2a drawing by Mercury.

b) Metal $\cdots\pi$  and CH $\cdots\pi$  interactions of 2b:

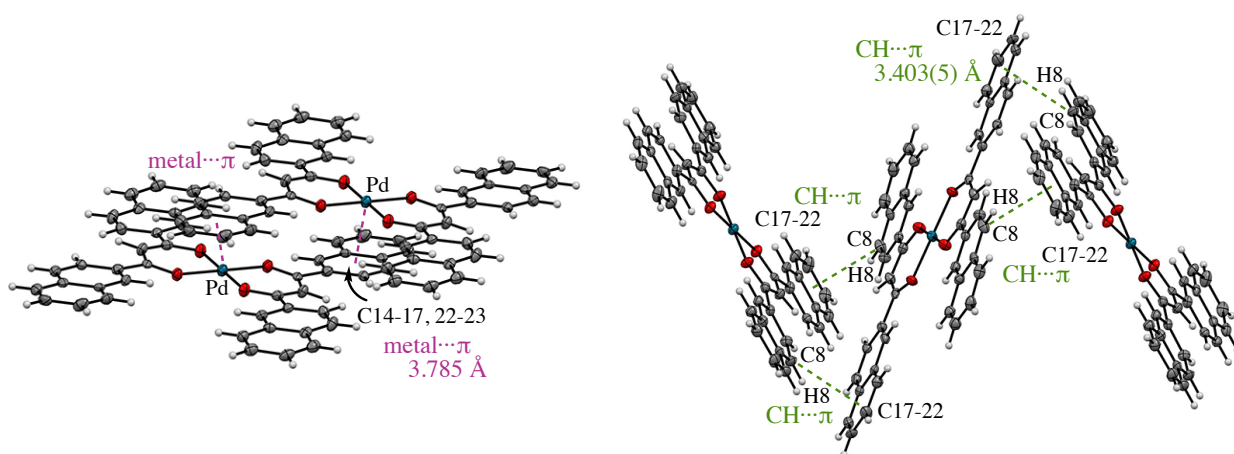

Figure S9. Parts of packing structure of 2b drawing by Mercury.

c) Metal $\cdots\pi$  and CH $\cdots\pi$  interactions of 2c:

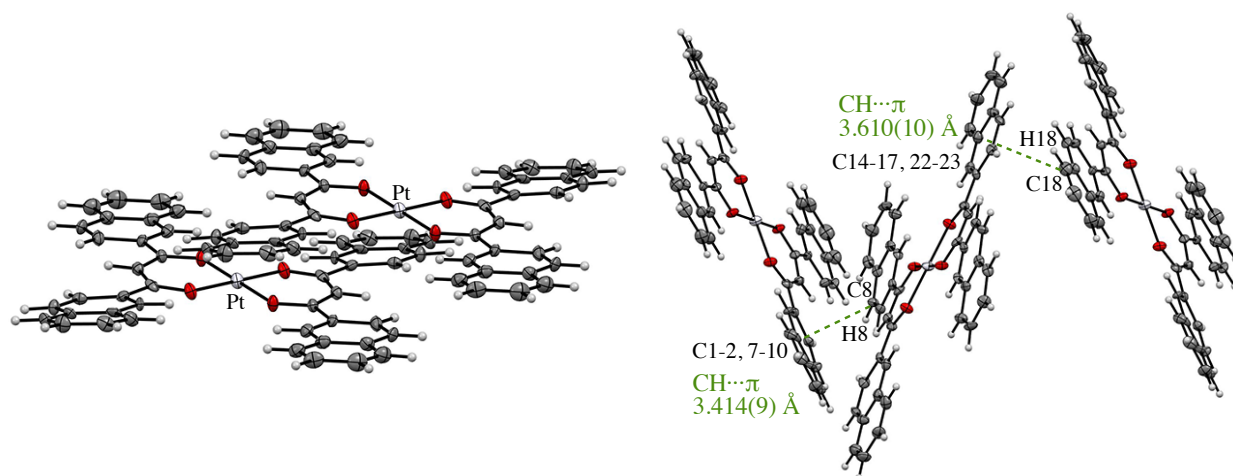

Figure S10. Parts of packing structure of 2c drawing by Mercury.



## S5. DFT calculations of 1 and 2.

DFT calculation was performed by Spartan'18 and used  $\omega$ B97X-D and 6-31G\* as a functional and basis set, respectively. The structures of **1a** and **1b** were used by the previously reported CIF data [CCDC1441959 for **1a**<sup>1)</sup> and CCDC1229561 for **1b**<sup>2)</sup>].

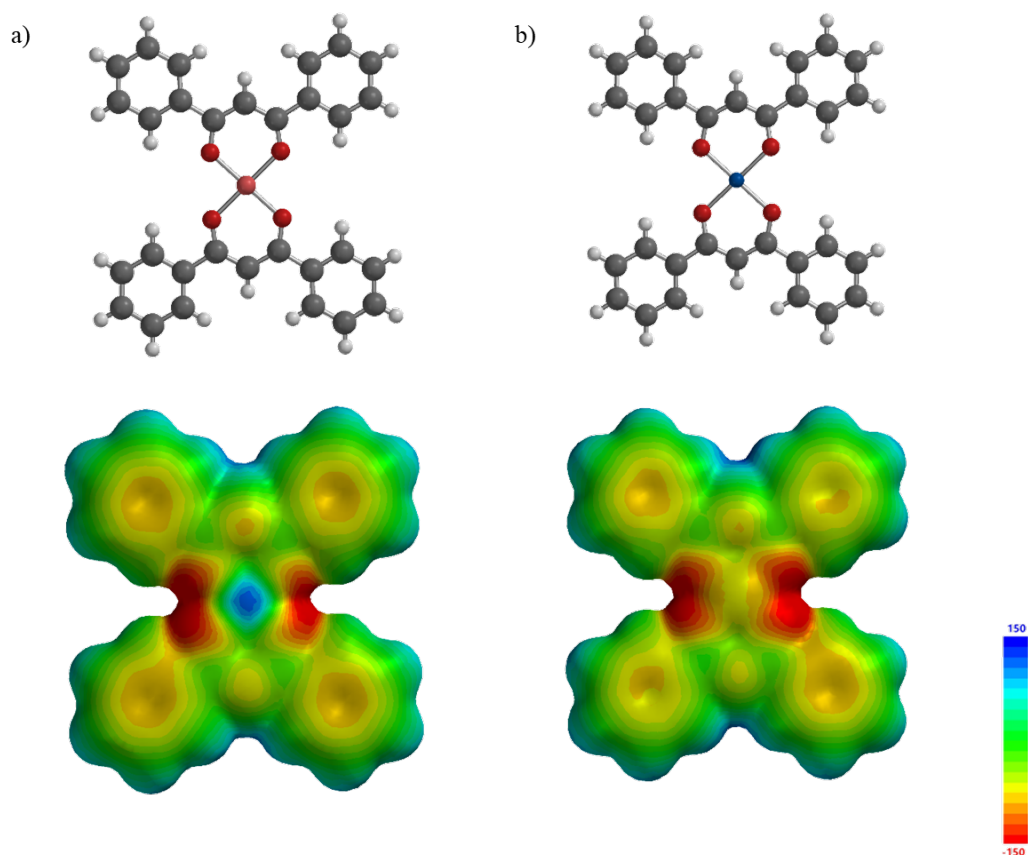

**Figure S11.** The energy potential maps of a) **1a** and b) **2a**: the color of potential is shown between  $-150 \text{ kJ mol}^{-1}$  (red) to  $+150 \text{ kJ mol}^{-1}$  (blue).

**Table S2.** The remarkable values of electrostatic potential ( $\text{kJ mol}^{-1}$ ) in the complexes **1** and **2**.

|              | <b>1a</b> | <b>1b</b> | <b>2a</b> | <b>2b</b> | <b>2c</b> |
|--------------|-----------|-----------|-----------|-----------|-----------|
| maximum      | +116.71   | +112.23   | +122.84   | +103.00   | +104.11   |
| minimum      | -199.12   | -184.77   | -194.23   | -186.62   | -177.20   |
| $\pi$ center | -75 ~ -85 | -75 ~ -85 | -70 ~ -80 | -70 ~ -80 | -70 ~ -80 |
| metal        | +116.71   | -73       | +122.84   | -75       | -113.9    |

1) S. Layek, S. Kumari, Anuradha, B. Agrahari, R. Ganguly, D. D. Pathak, *Inorg. Chim. Acta*, 2016, **453**, 735.

2) E. A. Shugam, L. M. Shkol'nikova, A. N. Knyazeva, *Zh. Strukt. Khim. (J. Struct. Chem.)*, 1968, **9**, 222.
